# Supplementary material for: Predictors of Human Milk Fatty Acids and Associations with Infant Growth in a Norwegian Birth Cohort
Source: MDPI journal article supplement (doi:10.3390/nu14183858), 2022-09-17
Supplement: s1 [file s1]

**Supplemental Table S1. Adjustment sets for each predictor-triglyceride fatty acid composition model<sup>1</sup>**

| Predictor                                    | Adjustment set                                                                                                                                         |
|----------------------------------------------|--------------------------------------------------------------------------------------------------------------------------------------------------------|
| Body mass index (BMI) <sup>2</sup>           | Maternal age, education <sup>3</sup> , parity, infant age at milk collection <sup>4</sup> , formula introduction <sup>5</sup>                          |
| Excess weight gain in pregnancy <sup>6</sup> | Gestational age, maternal age, education, parity, infant age at milk collection, formula introduction                                                  |
| Parity <sup>7</sup>                          | Maternal age, education, infant age at milk collection, formula introduction                                                                           |
| Smoking <sup>8</sup>                         | Maternal education, infant age at milk collection, formula introduction                                                                                |
| Gestational age <sup>9</sup>                 | BMI, smoking, parity, infant age at milk collection, formula introduction                                                                              |
| Fatty fish intake <sup>10</sup>              | BMI, education, cod liver oil, infant age at milk collection, formula introduction                                                                     |
| Delivery mode <sup>11</sup>                  | Maternal age, BMI, birthweight, gestational age, excess weight gain in pregnancy, parity, smoking, infant age at milk collection, formula introduction |
| Cod liver oil intake <sup>12</sup>           | Education, BMI, fatty fish intake, infant age at milk collection, formula introduction                                                                 |
| Maternal age <sup>13</sup>                   | Parity, infant age at milk collection, formula introduction                                                                                            |

<sup>1</sup> Outcome for all models was percent composition of triglyceride fatty acids in milk.

<sup>2</sup> Defined as underweight (BMI < 18.5 kg/m<sup>2</sup>), normal/overweight weight (BMI 18.5 – 29.99 kg/m<sup>2</sup>), or overweight/obese (BMI ≥30 kg/m<sup>2</sup>).

<sup>3</sup> Defined as <12 years, 12 years, or >12 years of maternal education at the start of pregnancy.

<sup>4</sup> Measured in days.

<sup>5</sup> Defined as any formula consumed by the infant at the time that milk was collected (yes versus no) as reported by the mother.

<sup>6</sup> Defined by BMI according to guidelines set forth by Institutes of Medicine: for underweight women, >18.1kg; for normal weight women, >15.9kg; for overweight women, >11.3kg; and for obese women, >9.1kg.

<sup>7</sup> Defined as primiparous or multiparous.

<sup>8</sup> Current smoker versus former/never smoker at the start of pregnancy.

<sup>9</sup> Defined as gestational age at birth in days.

<sup>10</sup> Defined as number of fatty fish dinners consumed in the previous year.

<sup>11</sup> Vaginal delivery versus cesarean section.

<sup>12</sup> Defined as servings of cod liver oil consumed in the previous year.

<sup>13</sup> Defined as maternal age in years at the start of pregnancy.

**Supplemental Figure S1. Directed acyclic graph representing association between triglyceide fatty acid composition in milk and infant growth between 0 and 6 months**

Legend: Green circle represents exposure and its antecedents, blue circle represents outcome and its antecedents. Red circles represent confounding variables. Arrows represent direction of effect.

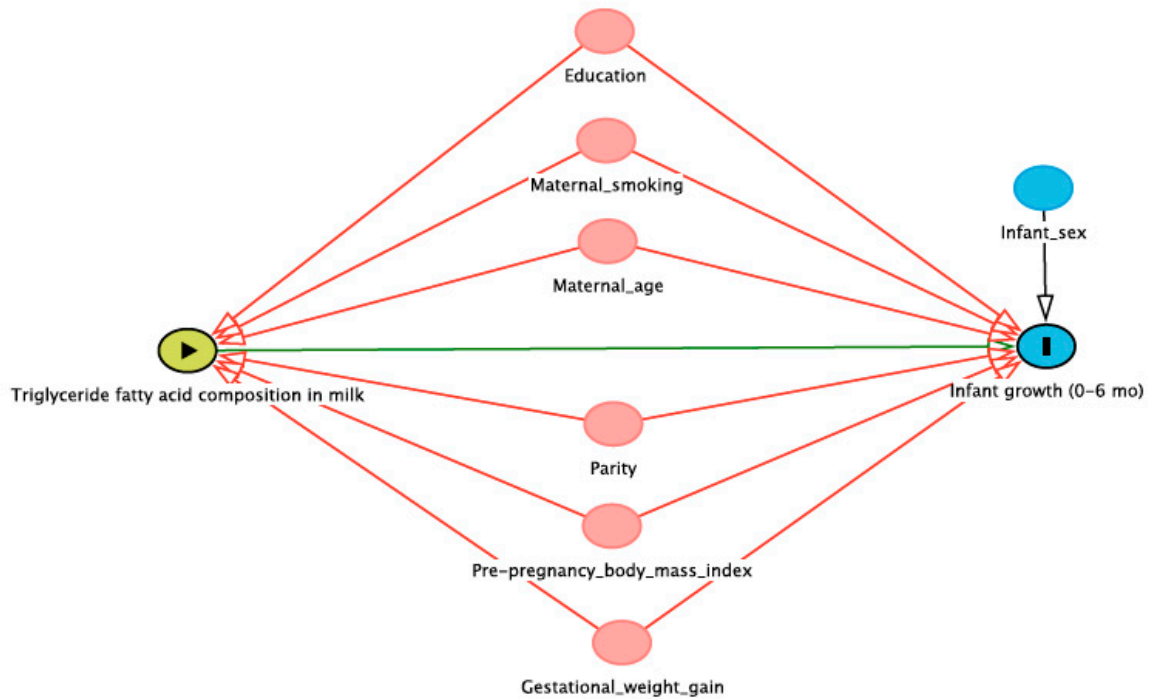

**Supplemental Table S2. Comparison of study subset ( $n = 789$ ) to remaining HUMIS-NoMIC cohort ( $n = 1817$ ) and larger Norwegian population**

| Characteristic <sup>1</sup>       | Study subset | Participants not included |                      | General population <sup>2</sup> |
|-----------------------------------|--------------|---------------------------|----------------------|---------------------------------|
|                                   | n=789        | n=1817                    | p-value <sup>3</sup> | n=126182                        |
| Maternal age (years)              | 29.6         | 30.1                      | 0.02                 | 29                              |
| Childs birth weight (g)           | 3629         | 3479                      | <0.001               | 3570                            |
| Gestational age (days)            | 280          | 277                       | <0.001               | 282                             |
| Maternal parity (%)               |              |                           | 0.07                 |                                 |
| Primiparous                       | 39.8         | 43.64                     |                      | 43.8                            |
| Maternal smoking <sup>4</sup> (%) |              |                           | 0.93                 |                                 |
| No                                | 88.4         | 87.4                      |                      | 86.8                            |
| Yes                               | 11.6         | 12.6                      |                      | 13.2                            |
| Child sex (%)                     |              |                           | 0.47                 |                                 |
| Female                            | 53.5         | 52.0                      |                      | 48.7                            |
| Male                              | 46.5         | 48.0                      |                      | 51.2                            |

<sup>1</sup> Mean value, unless otherwise noted.

<sup>2</sup> Information on the general population of recent mothers was obtained through the Norwegian Medical Birth Registry (which records all births in Norway). Mothers who had given birth between 2001 and 2003 were selected and their characteristics compared to the HUMIS participants.

<sup>3</sup> Differences between study sample, remaining HUMIS participants evaluated through the student's t-test for continuous variables and chi-square test for categorical variables.

<sup>4</sup> Smoking at the start of pregnancy.

**Supplemental Table S3. Associations<sup>1</sup> of maternal predictors and triglyceride fatty acid percent composition**

| Exposure                                       | Outcome <sup>2</sup> | $\beta$ -Coefficient | P-value <sup>3</sup> | L95 <sup>4</sup> | U95 <sup>5</sup> |
|------------------------------------------------|----------------------|----------------------|----------------------|------------------|------------------|
| Underweight body mass index (BMI) <sup>6</sup> | C8:0                 | 0.03                 | 0.15                 | -0.01            | 0.06             |
| Underweight BMI                                | C10:0                | -0.01                | 0.84                 | -0.14            | 0.12             |
| Underweight BMI                                | C12:0                | 0.09                 | 0.75                 | -0.49            | 0.68             |
| Underweight BMI                                | C13:0                | 0.03                 | 0.003                | 0.01             | 0.05             |
| Underweight BMI                                | C14:0                | 0.18                 | 0.49                 | -0.33            | 0.68             |
| Underweight BMI                                | C14:1                | -0.03                | 0.003                | -0.06            | -0.01            |
| Underweight BMI                                | C15:0                | 0.01                 | 0.57                 | -0.02            | 0.04             |
| Underweight BMI                                | C15:1                | 0.00                 | 0.27                 | -0.01            | 0.00             |
| Underweight BMI                                | C16:0                | -0.09                | 0.77                 | -0.67            | 0.49             |
| Underweight BMI                                | C16:1t               | -0.01                | 0.10                 | -0.02            | 0.00             |
| Underweight BMI                                | C16:1n-7             | -0.30                | 0.005                | -0.51            | -0.09            |
| Underweight BMI                                | C17:0                | -0.01                | 0.27                 | -0.02            | 0.01             |
| Underweight BMI                                | C18:0                | 0.29                 | 0.20                 | -0.16            | 0.74             |
| Underweight BMI                                | C18:1t               | -0.06                | 0.06                 | -0.13            | 0.00             |
| Underweight BMI                                | C18:1n-9             | -0.49                | 0.30                 | -1.41            | 0.43             |
| Underweight BMI                                | C18:1n-7             | -0.07                | 0.08                 | -0.15            | 0.01             |
| Underweight BMI                                | C18:2n-6             | 0.50                 | 0.26                 | -0.37            | 1.37             |
| Underweight BMI                                | C18:3n-6             | -0.02                | 0.006                | -0.03            | -0.01            |
| Underweight BMI                                | C18:3n-3             | -0.01                | 0.87                 | -0.11            | 0.09             |
| Underweight BMI                                | C20:1n-9             | 0.01                 | 0.75                 | -0.03            | 0.04             |
| Underweight BMI                                | C20:2n-6             | 0.03                 | 0.25                 | -0.02            | 0.08             |
| Underweight BMI                                | C20:3n-9             | 0.00                 | 0.73                 | 0.00             | 0.00             |
| Underweight BMI                                | C20:3n-6             | -0.02                | 0.25                 | -0.04            | 0.01             |
| Underweight BMI                                | C20:4n-6             | -0.02                | 0.09                 | -0.05            | 0.00             |
| Underweight BMI                                | C20:3n-3             | 0.00                 | 0.09                 | 0.00             | 0.01             |
| Underweight BMI                                | C22:0                | 0.02                 | 0.03                 | 0.00             | 0.03             |
| Underweight BMI                                | C22:1t               | -0.01                | 0.27                 | -0.02            | 0.01             |
| Underweight BMI                                | C20:5n-3             | -0.01                | 0.55                 | -0.03            | 0.02             |
| Underweight BMI                                | C22:4n-6             | 0.00                 | 0.74                 | -0.01            | 0.01             |
| Underweight BMI                                | C22:5n-6             | 0.01                 | 0.02                 | 0.00             | 0.01             |
| Underweight BMI                                | C22:5n-3             | -0.01                | 0.41                 | -0.03            | 0.01             |
| Underweight BMI                                | C22:6n-3             | -0.03                | 0.43                 | -0.11            | 0.05             |
| Underweight BMI                                | SFA                  | 0.54                 | 0.42                 | -0.77            | 1.84             |
| Underweight BMI                                | PUFA                 | 0.43                 | 0.39                 | -0.56            | 1.41             |

| Exposure               | Outcome <sup>2</sup> | $\beta$ -Coefficient | P-value <sup>3</sup> | L95 <sup>4</sup> | U95 <sup>5</sup> |
|------------------------|----------------------|----------------------|----------------------|------------------|------------------|
| Underweight BMI        | n-6 PUFA             | 0.48                 | 0.30                 | -0.42            | 1.39             |
| Underweight BMI        | n-3 PUFA             | -0.05                | 0.55                 | -0.22            | 0.12             |
| Underweight BMI        | MUFA                 | -0.89                | 0.09                 | -1.92            | 0.14             |
| Underweight BMI        | Trans FA             | -0.08                | 0.03                 | -0.15            | -0.01            |
| Underweight BMI        | SFA/PUFA             | -0.03                | 0.86                 | -0.31            | 0.26             |
| Underweight BMI        | n-6/n-3 PUFA         | 0.48                 | 0.15                 | -0.17            | 1.12             |
| Underweight BMI        | MCFA                 | 0.28                 | 0.64                 | -0.89            | 1.46             |
| Underweight BMI        | LC-PUFA              | -0.08                | 0.26                 | -0.21            | 0.06             |
| Obese BMI <sup>7</sup> | C8:0                 | 0.00                 | 0.91                 | -0.02            | 0.02             |
| Obese BMI              | C10:0                | 0.02                 | 0.63                 | -0.06            | 0.10             |
| Obese BMI              | C12:0                | 0.16                 | 0.38                 | -0.19            | 0.51             |
| Obese BMI              | C13:0                | 0.00                 | 0.42                 | -0.02            | 0.01             |
| Obese BMI              | C14:0                | 0.15                 | 0.33                 | -0.15            | 0.45             |
| Obese BMI              | C14:1                | -0.02                | 0.01                 | -0.03            | 0.00             |
| Obese BMI              | C15:0                | -0.04                | <0.001               | -0.06            | -0.02            |
| Obese BMI              | C15:1                | -0.01                | 0.01                 | -0.01            | 0.00             |
| Obese BMI              | C16:0                | 0.15                 | 0.42                 | -0.21            | 0.50             |
| Obese BMI              | C16:1t               | -0.01                | 0.04                 | -0.01            | 0.00             |
| Obese BMI              | C16:1n-7             | 0.00                 | 1.00                 | -0.13            | 0.13             |
| Obese BMI              | C17:0                | -0.02                | <0.001               | -0.03            | -0.01            |
| Obese BMI              | C18:0                | -0.19                | 0.16                 | -0.46            | 0.08             |
| Obese BMI              | C18:1t               | -0.06                | 0.003                | -0.10            | -0.02            |
| Obese BMI              | C18:1n-9             | 0.43                 | 0.12                 | -0.11            | 0.97             |
| Obese BMI              | C18:1n-7             | 0.03                 | 0.21                 | -0.02            | 0.08             |
| Obese BMI              | C18:2n-6             | -0.37                | 0.17                 | -0.90            | 0.16             |
| Obese BMI              | C18:3n-6             | -0.01                | 0.21                 | -0.01            | 0.00             |
| Obese BMI              | C18:3n-3             | -0.06                | 0.05                 | -0.12            | 0.00             |
| Obese BMI              | C20:1n-9             | -0.02                | 0.06                 | -0.04            | 0.00             |
| Obese BMI              | C20:2n-6             | 0.01                 | 0.43                 | -0.02            | 0.04             |
| Obese BMI              | C20:3n-9             | 0.00                 | 0.90                 | 0.00             | 0.00             |
| Obese BMI              | C20:3n-6             | 0.01                 | 0.12                 | 0.00             | 0.03             |
| Obese BMI              | C20:4n-6             | -0.01                | 0.46                 | -0.02            | 0.01             |
| Obese BMI              | C20:3n-3             | 0.00                 | 0.51                 | 0.00             | 0.00             |
| Obese BMI              | C22:0                | 0.00                 | 0.96                 | -0.01            | 0.01             |
| Obese BMI              | C22:1t               | -0.01                | 0.02                 | -0.02            | 0.00             |
| Obese BMI              | C20:5n-3             | -0.03                | <0.001               | -0.05            | -0.02            |

| Exposure                                     | Outcome <sup>2</sup> | $\beta$ -Coefficient | P-value <sup>3</sup> | L95 <sup>4</sup> | U95 <sup>5</sup> |
|----------------------------------------------|----------------------|----------------------|----------------------|------------------|------------------|
| Obese BMI                                    | C22:4n-6             | 0.01                 | 0.06                 | 0.00             | 0.01             |
| Obese BMI                                    | C22:5n-6             | 0.00                 | 0.28                 | -0.01            | 0.00             |
| Obese BMI                                    | C22:5n-3             | -0.02                | <0.001               | -0.03            | -0.01            |
| Obese BMI                                    | C22:6n-3             | -0.10                | <0.001               | -0.15            | -0.06            |
| Obese BMI                                    | SFA                  | 0.22                 | 0.57                 | -0.55            | 1.00             |
| Obese BMI                                    | PUFA                 | -0.57                | 0.06                 | -1.16            | 0.03             |
| Obese BMI                                    | n-6 PUFA             | -0.35                | 0.21                 | -0.90            | 0.20             |
| Obese BMI                                    | n-3 PUFA             | -0.22                | <0.001               | -0.32            | -0.11            |
| Obese BMI                                    | MUFA                 | 0.42                 | 0.18                 | -0.19            | 1.03             |
| Obese BMI                                    | Trans FA             | -0.08                | 0.001                | -0.12            | -0.03            |
| Obese BMI                                    | SFA/PUFA             | 0.17                 | 0.05                 | 0.00             | 0.34             |
| Obese BMI                                    | n-6/n-3 PUFA         | 0.66                 | 0.001                | 0.28             | 1.05             |
| Obese BMI                                    | MCFA                 | 0.33                 | 0.36                 | -0.38            | 1.03             |
| Obese BMI                                    | LC-PUFA              | -0.14                | <0.001               | -0.22            | -0.06            |
| Excess weight gain in pregnancy <sup>8</sup> | C8:0                 | -0.01                | 0.11                 | -0.03            | 0.00             |
| Excess weight gain in pregnancy              | C10:0                | -0.08                | 0.006                | -0.13            | -0.02            |
| Excess weight gain in pregnancy              | C12:0                | -0.32                | 0.01                 | -0.57            | -0.07            |
| Excess weight gain in pregnancy              | C13:0                | -0.01                | 0.10                 | -0.02            | 0.00             |
| Excess weight gain in pregnancy              | C14:0                | -0.26                | 0.02                 | -0.47            | -0.05            |
| Excess weight gain in pregnancy              | C14:1                | 0.01                 | 0.18                 | 0.00             | 0.02             |
| Excess weight gain in pregnancy              | C15:0                | -0.01                | 0.18                 | -0.02            | 0.00             |
| Excess weight gain in pregnancy              | C15:1                | 0.00                 | 0.41                 | 0.00             | 0.00             |
| Excess weight gain in pregnancy              | C16:0                | 0.02                 | 0.85                 | -0.23            | 0.27             |
| Excess weight gain in pregnancy              | C16:1t               | 0.00                 | 0.38                 | 0.00             | 0.01             |
| Excess weight gain in pregnancy              | C16:1n-7             | 0.27                 | <0.001               | 0.19             | 0.36             |
| Excess weight gain in pregnancy              | C17:0                | 0.00                 | 0.28                 | -0.01            | 0.00             |
| Excess weight gain in pregnancy              | C18:0                | -0.42                | <0.001               | -0.61            | -0.23            |
| Excess weight gain in pregnancy              | C18:1t               | 0.01                 | 0.61                 | -0.02            | 0.04             |
| Excess weight gain in pregnancy              | C18:1n-9             | 0.43                 | 0.03                 | 0.05             | 0.81             |
| Excess weight gain in pregnancy              | C18:1n-7             | 0.10                 | <0.001               | 0.07             | 0.13             |
| Excess weight gain in pregnancy              | C18:2n-6             | 0.26                 | 0.16                 | -0.11            | 0.64             |
| Excess weight gain in pregnancy              | C18:3n-6             | 0.00                 | 0.15                 | 0.00             | 0.01             |
| Excess weight gain in pregnancy              | C18:3n-3             | 0.02                 | 0.49                 | -0.03            | 0.06             |
| Excess weight gain in pregnancy              | C20:1n-9             | 0.00                 | 0.60                 | -0.02            | 0.01             |
| Excess weight gain in pregnancy              | C20:2n-6             | 0.00                 | 0.93                 | -0.02            | 0.02             |
| Excess weight gain in pregnancy              | C20:3n-9             | 0.00                 | 0.99                 | 0.00             | 0.00             |

# Supplementary data

7

| Exposure                        | Outcome <sup>2</sup> | $\beta$ -Coefficient | P-value <sup>3</sup> | L95 <sup>4</sup> | U95 <sup>5</sup> |
|---------------------------------|----------------------|----------------------|----------------------|------------------|------------------|
| Excess weight gain in pregnancy | C20:3n-6             | -0.01                | 0.17                 | -0.02            | 0.00             |
| Excess weight gain in pregnancy | C20:4n-6             | 0.01                 | 0.02                 | 0.00             | 0.02             |
| Excess weight gain in pregnancy | C20:3n-3             | 0.00                 | 0.89                 | 0.00             | 0.00             |
| Excess weight gain in pregnancy | C22:0                | -0.01                | 0.002                | -0.02            | 0.00             |
| Excess weight gain in pregnancy | C22:1t               | 0.00                 | 0.16                 | -0.01            | 0.00             |
| Excess weight gain in pregnancy | C20:5n-3             | 0.00                 | 0.66                 | -0.01            | 0.01             |
| Excess weight gain in pregnancy | C22:4n-6             | 0.00                 | 0.20                 | 0.00             | 0.01             |
| Excess weight gain in pregnancy | C22:5n-6             | 0.00                 | 0.90                 | 0.00             | 0.00             |
| Excess weight gain in pregnancy | C22:5n-3             | 0.00                 | 0.51                 | -0.01            | 0.01             |
| Excess weight gain in pregnancy | C22:6n-3             | 0.00                 | 0.94                 | -0.03            | 0.03             |
| Excess weight gain in pregnancy | SFA                  | -1.10                | <0.001               | -1.64            | -0.55            |
| Excess weight gain in pregnancy | PUFA                 | 0.29                 | 0.18                 | -0.13            | 0.71             |
| Excess weight gain in pregnancy | n-6 PUFA             | 0.28                 | 0.16                 | -0.11            | 0.66             |
| Excess weight gain in pregnancy | n-3 PUFA             | 0.01                 | 0.76                 | -0.06            | 0.08             |
| Excess weight gain in pregnancy | MUFA                 | 0.80                 | <0.001               | 0.37             | 1.23             |
| Excess weight gain in pregnancy | Trans FA             | 0.01                 | 0.73                 | -0.03            | 0.04             |
| Excess weight gain in pregnancy | SFA/PUFA             | -0.14                | 0.02                 | -0.26            | -0.02            |
| Excess weight gain in pregnancy | n-6/n-3 PUFA         | 0.12                 | 0.41                 | -0.16            | 0.40             |
| Excess weight gain in pregnancy | MCFA                 | -0.67                | 0.009                | -1.17            | -0.17            |
| Excess weight gain in pregnancy | LC-PUFA              | 0.00                 | 0.93                 | -0.06            | 0.06             |
| Parity <sup>9</sup>             | C8:0                 | -0.01                | 0.41                 | -0.02            | 0.01             |
| Parity                          | C10:0                | -0.08                | 0.005                | -0.14            | -0.02            |
| Parity                          | C12:0                | -0.17                | 0.20                 | -0.43            | 0.09             |
| Parity                          | C13:0                | 0.00                 | 0.93                 | -0.01            | 0.01             |
| Parity                          | C14:0                | 0.01                 | 0.93                 | -0.21            | 0.23             |
| Parity                          | C14:1                | 0.01                 | 0.31                 | -0.01            | 0.02             |
| Parity                          | C15:0                | 0.00                 | 0.62                 | -0.01            | 0.02             |
| Parity                          | C15:1                | 0.00                 | 0.19                 | 0.00             | 0.01             |
| Parity                          | C16:0                | 0.31                 | 0.03                 | 0.04             | 0.58             |
| Parity                          | C16:1t               | 0.00                 | 0.52                 | -0.01            | 0.00             |
| Parity                          | C16:1n-7             | -0.19                | <0.001               | -0.28            | -0.09            |
| Parity                          | C17:0                | 0.01                 | 0.09                 | 0.00             | 0.01             |
| Parity                          | C18:0                | 0.50                 | <0.001               | 0.30             | 0.71             |
| Parity                          | C18:1t               | 0.00                 | 0.96                 | -0.03            | 0.03             |
| Parity                          | C18:1n-9             | -0.23                | 0.27                 | -0.63            | 0.18             |
| Parity                          | C18:1n-7             | -0.07                | <0.001               | -0.11            | -0.04            |

| Exposure              | Outcome <sup>2</sup> | $\beta$ -Coefficient | P-value <sup>3</sup> | L95 <sup>4</sup> | U95 <sup>5</sup> |
|-----------------------|----------------------|----------------------|----------------------|------------------|------------------|
| Parity                | C18:2n-6             | 0.02                 | 0.90                 | -0.37            | 0.42             |
| Parity                | C18:3n-6             | 0.01                 | 0.001                | 0.00             | 0.02             |
| Parity                | C18:3n-3             | 0.02                 | 0.38                 | -0.03            | 0.07             |
| Parity                | C20:1n-9             | -0.02                | 0.005                | -0.04            | -0.01            |
| Parity                | C20:2n-6             | -0.02                | 0.14                 | -0.04            | 0.01             |
| Parity                | C20:3n-9             | 0.00                 | 0.76                 | 0.00             | 0.00             |
| Parity                | C20:3n-6             | 0.01                 | 0.04                 | 0.00             | 0.03             |
| Parity                | C20:4n-6             | -0.01                | 0.33                 | -0.02            | 0.01             |
| Parity                | C20:3n-3             | 0.00                 | 0.42                 | 0.00             | 0.00             |
| Parity                | C22:0                | 0.01                 | 0.05                 | 0.00             | 0.02             |
| Parity                | C22:1t               | 0.00                 | 0.53                 | -0.01            | 0.00             |
| Parity                | C20:5n-3             | -0.02                | <0.001               | -0.04            | -0.01            |
| Parity                | C22:4n-6             | 0.00                 | 0.28                 | 0.00             | 0.01             |
| Parity                | C22:5n-6             | 0.00                 | 0.10                 | 0.00             | 0.00             |
| Parity                | C22:5n-3             | -0.02                | 0.001                | -0.03            | -0.01            |
| Parity                | C22:6n-3             | -0.08                | <0.001               | -0.12            | -0.05            |
| Parity                | SFA                  | 0.58                 | 0.05                 | 0.00             | 1.16             |
| Parity                | PUFA                 | -0.07                | 0.75                 | -0.52            | 0.38             |
| Parity                | n-6 PUFA             | 0.03                 | 0.89                 | -0.38            | 0.44             |
| Parity                | n-3 PUFA             | -0.10                | 0.01                 | -0.18            | -0.02            |
| Parity                | MUFA                 | -0.51                | 0.03                 | -0.96            | -0.05            |
| Parity                | Trans FA             | 0.00                 | 0.89                 | -0.03            | 0.03             |
| Parity                | SFA/PUFA             | 0.08                 | 0.26                 | -0.06            | 0.21             |
| Parity                | n-6/n-3 PUFA         | 0.39                 | 0.01                 | 0.09             | 0.70             |
| Parity                | MCFA                 | -0.25                | 0.35                 | -0.77            | 0.27             |
| Parity                | LC-PUFA              | -0.11                | 0.001                | -0.17            | -0.05            |
| Smoking <sup>10</sup> | C8:0                 | 0.01                 | 0.23                 | -0.01            | 0.04             |
| Smoking               | C10:0                | 0.11                 | 0.01                 | 0.02             | 0.19             |
| Smoking               | C12:0                | 0.53                 | 0.008                | 0.14             | 0.91             |
| Smoking               | C13:0                | -0.01                | 0.15                 | -0.02            | 0.00             |
| Smoking               | C14:0                | 0.31                 | 0.06                 | -0.01            | 0.64             |
| Smoking               | C14:1                | 0.00                 | 0.97                 | -0.02            | 0.02             |
| Smoking               | C15:0                | -0.02                | 0.12                 | -0.04            | 0.00             |
| Smoking               | C15:1                | 0.00                 | 0.14                 | -0.01            | 0.00             |
| Smoking               | C16:0                | -0.07                | 0.72                 | -0.47            | 0.33             |
| Smoking               | C16:1t               | 0.00                 | 0.85                 | -0.01            | 0.01             |



| Exposure                      | Outcome <sup>2</sup> | $\beta$ -Coefficient | P-value <sup>3</sup> | L95 <sup>4</sup> | U95 <sup>5</sup> |
|-------------------------------|----------------------|----------------------|----------------------|------------------|------------------|
| Smoking                       | C16:1n-7             | -0.11                | 0.14                 | -0.26            | 0.04             |
| Smoking                       | C17:0                | -0.01                | 0.14                 | -0.02            | 0.00             |
| Smoking                       | C18:0                | 0.26                 | 0.11                 | -0.06            | 0.57             |
| Smoking                       | C18:1t               | 0.03                 | 0.29                 | -0.02            | 0.07             |
| Smoking                       | C18:1n-9             | -0.56                | 0.06                 | -1.15            | 0.03             |
| Smoking                       | C18:1n-7             | -0.05                | 0.06                 | -0.11            | 0.00             |
| Smoking                       | C18:2n-6             | -0.15                | 0.60                 | -0.74            | 0.43             |
| Smoking                       | C18:3n-6             | 0.00                 | 0.57                 | -0.01            | 0.01             |
| Smoking                       | C18:3n-3             | -0.01                | 0.67                 | -0.08            | 0.05             |
| Smoking                       | C20:1n-9             | -0.04                | 0.007                | -0.06            | -0.01            |
| Smoking                       | C20:2n-6             | -0.01                | 0.45                 | -0.05            | 0.02             |
| Smoking                       | C20:3n-9             | 0.00                 | 0.53                 | 0.00             | 0.00             |
| Smoking                       | C20:3n-6             | 0.00                 | 0.87                 | -0.02            | 0.02             |
| Smoking                       | C20:4n-6             | -0.01                | 0.10                 | -0.03            | 0.00             |
| Smoking                       | C20:3n-3             | 0.00                 | 0.25                 | -0.01            | 0.00             |
| Smoking                       | C22:0                | 0.00                 | 0.72                 | -0.01            | 0.01             |
| Smoking                       | C22:1t               | -0.01                | 0.05                 | -0.02            | 0.00             |
| Smoking                       | C20:5n-3             | -0.03                | 0.003                | -0.05            | -0.01            |
| Smoking                       | C22:4n-6             | 0.00                 | 0.33                 | -0.01            | 0.00             |
| Smoking                       | C22:5n-6             | 0.00                 | 0.72                 | 0.00             | 0.00             |
| Smoking                       | C22:5n-3             | -0.03                | <0.001               | -0.05            | -0.02            |
| Smoking                       | C22:6n-3             | -0.10                | <0.001               | -0.15            | -0.04            |
| Smoking                       | SFA                  | 1.11                 | 0.01                 | 0.27             | 1.96             |
| Smoking                       | PUFA                 | -0.36                | 0.28                 | -1.02            | 0.30             |
| Smoking                       | n-6 PUFA             | -0.19                | 0.54                 | -0.79            | 0.42             |
| Smoking                       | n-3 PUFA             | -0.17                | 0.006                | -0.29            | -0.05            |
| Smoking                       | MUFA                 | -0.77                | 0.03                 | -1.45            | -0.09            |
| Smoking                       | Trans FA             | 0.02                 | 0.51                 | -0.03            | 0.07             |
| Smoking                       | SFA/PUFA             | 0.15                 | 0.12                 | -0.04            | 0.34             |
| Smoking                       | n-6/n-3 PUFA         | 0.58                 | 0.02                 | 0.10             | 1.06             |
| Smoking                       | MCFA                 | 0.96                 | 0.01                 | 0.19             | 1.72             |
| Smoking                       | LC-PUFA              | -0.17                | <0.001               | -0.27            | -0.08            |
| Gestational age <sup>11</sup> | C8:0                 | 0.00                 | 0.05                 | 0.00             | 0.00             |
| Gestational age               | C10:0                | 0.00                 | 0.002                | -0.01            | 0.00             |
| Gestational age               | C12:0                | -0.01                | 0.002                | -0.02            | -0.01            |
| Gestational age               | C13:0                | 0.00                 | 0.88                 | 0.00             | 0.00             |

| Exposure        | Outcome <sup>2</sup> | $\beta$ -Coefficient | P-value <sup>3</sup> | L95 <sup>4</sup> | U95 <sup>5</sup> |
|-----------------|----------------------|----------------------|----------------------|------------------|------------------|
| Gestational age | C14:0                | -0.02                | <0.001               | -0.02            | -0.01            |
| Gestational age | C14:1                | 0.00                 | 0.99                 | 0.00             | 0.00             |
| Gestational age | C15:0                | 0.00                 | 0.30                 | 0.00             | 0.00             |
| Gestational age | C15:1                | 0.00                 | 0.03                 | 0.00             | 0.00             |
| Gestational age | C16:0                | 0.00                 | 0.72                 | -0.01            | 0.01             |
| Gestational age | C16:1t               | 0.00                 | 0.34                 | 0.00             | 0.00             |
| Gestational age | C16:1n-7             | 0.01                 | 0.002                | 0.00             | 0.01             |
| Gestational age | C17:0                | 0.00                 | 0.15                 | 0.00             | 0.00             |
| Gestational age | C18:0                | 0.00                 | 0.38                 | -0.01            | 0.00             |
| Gestational age | C18:1t               | 0.00                 | 0.41                 | 0.00             | 0.00             |
| Gestational age | C18:1n-9             | 0.02                 | 0.001                | 0.01             | 0.04             |
| Gestational age | C18:1n-7             | 0.00                 | 0.01                 | 0.00             | 0.00             |
| Gestational age | C18:2n-6             | 0.01                 | 0.45                 | -0.01            | 0.02             |
| Gestational age | C18:3n-6             | 0.00                 | 0.10                 | 0.00             | 0.00             |
| Gestational age | C18:3n-3             | 0.00                 | 0.67                 | 0.00             | 0.00             |
| Gestational age | C20:1n-9             | 0.00                 | 0.80                 | 0.00             | 0.00             |
| Gestational age | C20:2n-6             | 0.00                 | 0.08                 | 0.00             | 0.00             |
| Gestational age | C20:3n-9             | 0.00                 | 0.63                 | 0.00             | 0.00             |
| Gestational age | C20:3n-6             | 0.00                 | 0.06                 | 0.00             | 0.00             |
| Gestational age | C20:4n-6             | 0.00                 | 0.43                 | 0.00             | 0.00             |
| Gestational age | C20:3n-3             | 0.00                 | 0.01                 | 0.00             | 0.00             |
| Gestational age | C22:0                | 0.00                 | 0.43                 | 0.00             | 0.00             |
| Gestational age | C22:1t               | 0.00                 | 0.05                 | 0.00             | 0.00             |
| Gestational age | C20:5n-3             | 0.00                 | 0.96                 | 0.00             | 0.00             |
| Gestational age | C22:4n-6             | 0.00                 | 0.97                 | 0.00             | 0.00             |
| Gestational age | C22:5n-6             | 0.00                 | 0.57                 | 0.00             | 0.00             |
| Gestational age | C22:5n-3             | 0.00                 | 0.52                 | 0.00             | 0.00             |
| Gestational age | C22:6n-3             | 0.00                 | 0.50                 | 0.00             | 0.00             |
| Gestational age | SFA                  | -0.03                | 0.001                | -0.05            | -0.02            |
| Gestational age | PUFA                 | 0.00                 | 0.66                 | -0.01            | 0.02             |
| Gestational age | n-6 PUFA             | 0.00                 | 0.54                 | -0.01            | 0.02             |
| Gestational age | n-3 PUFA             | 0.00                 | 0.48                 | 0.00             | 0.00             |
| Gestational age | MUFA                 | 0.03                 | <0.001               | 0.02             | 0.05             |
| Gestational age | Trans FA             | 0.00                 | 0.58                 | 0.00             | 0.00             |
| Gestational age | SFA/PUFA             | 0.00                 | 0.18                 | -0.01            | 0.00             |
| Gestational age | n-6/n-3 PUFA         | 0.01                 | 0.26                 | 0.00             | 0.02             |

| Exposure                        | Outcome <sup>2</sup> | $\beta$ -Coefficient | P-value <sup>3</sup> | L95 <sup>4</sup> | U95 <sup>5</sup> |
|---------------------------------|----------------------|----------------------|----------------------|------------------|------------------|
| Gestational age                 | MCFA                 | -0.03                | <0.001               | -0.05            | -0.02            |
| Gestational age                 | LC-PUFA              | 0.00                 | 0.40                 | 0.00             | 0.00             |
| Fatty fish intake <sup>12</sup> | C8:0                 | 0.00                 | 0.18                 | 0.00             | 0.00             |
| Fatty fish intake               | C10:0                | 0.00                 | 0.83                 | 0.00             | 0.00             |
| Fatty fish intake               | C12:0                | 0.00                 | 0.58                 | -0.01            | 0.00             |
| Fatty fish intake               | C13:0                | 0.00                 | 0.73                 | 0.00             | 0.00             |
| Fatty fish intake               | C14:0                | 0.00                 | 0.72                 | 0.00             | 0.00             |
| Fatty fish intake               | C14:1                | 0.00                 | 0.30                 | 0.00             | 0.00             |
| Fatty fish intake               | C15:0                | 0.00                 | 0.21                 | 0.00             | 0.00             |
| Fatty fish intake               | C15:1                | 0.00                 | 0.83                 | 0.00             | 0.00             |
| Fatty fish intake               | C16:0                | 0.00                 | 0.17                 | -0.01            | 0.00             |
| Fatty fish intake               | C16:1t               | 0.00                 | 0.17                 | 0.00             | 0.00             |
| Fatty fish intake               | C16:1n-7             | 0.00                 | 0.03                 | 0.00             | 0.00             |
| Fatty fish intake               | C17:0                | 0.00                 | 0.13                 | 0.00             | 0.00             |
| Fatty fish intake               | C18:0                | 0.00                 | 0.77                 | 0.00             | 0.00             |
| Fatty fish intake               | C18:1t               | 0.00                 | 0.32                 | 0.00             | 0.00             |
| Fatty fish intake               | C18:1n-9             | 0.01                 | 0.09                 | 0.00             | 0.01             |
| Fatty fish intake               | C18:1n-7             | 0.00                 | 0.77                 | 0.00             | 0.00             |
| Fatty fish intake               | C18:2n-6             | 0.00                 | 0.43                 | -0.01            | 0.00             |
| Fatty fish intake               | C18:3n-6             | 0.00                 | 0.42                 | 0.00             | 0.00             |
| Fatty fish intake               | C18:3n-3             | 0.00                 | 0.01                 | 0.00             | 0.00             |
| Fatty fish intake               | C20:1n-9             | 0.00                 | <0.001               | 0.00             | 0.00             |
| Fatty fish intake               | C20:2n-6             | 0.00                 | 0.23                 | 0.00             | 0.00             |
| Fatty fish intake               | C20:3n-9             | 0.00                 | 0.03                 | 0.00             | 0.00             |
| Fatty fish intake               | C20:3n-6             | 0.00                 | 0.60                 | 0.00             | 0.00             |
| Fatty fish intake               | C20:4n-6             | 0.00                 | 0.62                 | 0.00             | 0.00             |
| Fatty fish intake               | C20:3n-3             | 0.00                 | 0.001                | 0.00             | 0.00             |
| Fatty fish intake               | C22:0                | 0.00                 | 0.46                 | 0.00             | 0.00             |
| Fatty fish intake               | C22:1t               | 0.00                 | <0.001               | 0.00             | 0.00             |
| Fatty fish intake               | C20:5n-3             | 0.00                 | <0.001               | 0.00             | 0.00             |
| Fatty fish intake               | C22:4n-6             | 0.00                 | 0.07                 | 0.00             | 0.00             |
| Fatty fish intake               | C22:5n-6             | 0.00                 | 0.35                 | 0.00             | 0.00             |
| Fatty fish intake               | C22:5n-3             | 0.00                 | <0.001               | 0.00             | 0.00             |
| Fatty fish intake               | C22:6n-3             | 0.00                 | <0.001               | 0.00             | 0.00             |
| Fatty fish intake               | SFA                  | -0.01                | 0.29                 | -0.02            | 0.00             |
| Fatty fish intake               | PUFA                 | 0.00                 | 0.86                 | -0.01            | 0.01             |

| Exposure                       | Outcome <sup>2</sup> | $\beta$ -Coefficient | P-value <sup>3</sup> | L95 <sup>4</sup> | U95 <sup>5</sup> |
|--------------------------------|----------------------|----------------------|----------------------|------------------|------------------|
| Fatty fish intake              | n-6 PUFA             | 0.00                 | 0.37                 | -0.01            | 0.00             |
| Fatty fish intake              | n-3 PUFA             | 0.00                 | <0.001               | 0.00             | 0.01             |
| Fatty fish intake              | MUFA                 | 0.00                 | 0.23                 | 0.00             | 0.01             |
| Fatty fish intake              | Trans FA             | 0.00                 | 0.78                 | 0.00             | 0.00             |
| Fatty fish intake              | SFA/PUFA             | 0.00                 | 0.36                 | 0.00             | 0.00             |
| Fatty fish intake              | n-6/n-3 PUFA         | -0.02                | <0.001               | -0.02            | -0.01            |
| Fatty fish intake              | MCFA                 | 0.00                 | 0.66                 | -0.01            | 0.01             |
| Fatty fish intake              | LC-PUFA              | 0.00                 | <0.001               | 0.00             | 0.00             |
| Mode of delivery <sup>13</sup> | C8:0                 | 0.02                 | 0.01                 | 0.00             | 0.04             |
| Mode of delivery               | C10:0                | 0.04                 | 0.32                 | -0.04            | 0.11             |
| Mode of delivery               | C12:0                | 0.25                 | 0.15                 | -0.09            | 0.58             |
| Mode of delivery               | C13:0                | 0.00                 | 0.76                 | -0.01            | 0.01             |
| Mode of delivery               | C14:0                | 0.31                 | 0.04                 | 0.02             | 0.59             |
| Mode of delivery               | C14:1                | 0.00                 | 0.97                 | -0.01            | 0.01             |
| Mode of delivery               | C15:0                | 0.00                 | 0.69                 | -0.02            | 0.02             |
| Mode of delivery               | C15:1                | 0.00                 | 0.53                 | -0.01            | 0.00             |
| Mode of delivery               | C16:0                | 0.20                 | 0.25                 | -0.14            | 0.55             |
| Mode of delivery               | C16:1t               | 0.00                 | 0.37                 | 0.00             | 0.01             |
| Mode of delivery               | C16:1n-7             | 0.04                 | 0.50                 | -0.08            | 0.16             |
| Mode of delivery               | C17:0                | 0.00                 | 0.82                 | -0.01            | 0.01             |
| Mode of delivery               | C18:0                | -0.07                | 0.60                 | -0.33            | 0.19             |
| Mode of delivery               | C18:1t               | -0.02                | 0.44                 | -0.05            | 0.02             |
| Mode of delivery               | C18:1n-9             | -0.16                | 0.54                 | -0.68            | 0.36             |
| Mode of delivery               | C18:1n-7             | 0.03                 | 0.22                 | -0.02            | 0.07             |
| Mode of delivery               | C18:2n-6             | -0.59                | 0.02                 | -1.11            | -0.08            |
| Mode of delivery               | C18:3n-6             | 0.00                 | 0.85                 | -0.01            | 0.01             |
| Mode of delivery               | C18:3n-3             | -0.03                | 0.34                 | -0.09            | 0.03             |
| Mode of delivery               | C20:1n-9             | -0.01                | 0.44                 | -0.03            | 0.01             |
| Mode of delivery               | C20:2n-6             | 0.01                 | 0.38                 | -0.02            | 0.05             |
| Mode of delivery               | C20:3n-9             | 0.00                 | 0.22                 | 0.00             | 0.00             |
| Mode of delivery               | C20:3n-6             | 0.01                 | 0.15                 | 0.00             | 0.03             |
| Mode of delivery               | C20:4n-6             | 0.01                 | 0.16                 | 0.00             | 0.03             |
| Mode of delivery               | C20:3n-3             | 0.00                 | 0.32                 | 0.00             | 0.00             |
| Mode of delivery               | C22:0                | 0.00                 | 0.61                 | -0.01            | 0.01             |
| Mode of delivery               | C22:1t               | 0.00                 | 0.87                 | -0.01            | 0.01             |
| Mode of delivery               | C20:5n-3             | -0.01                | 0.05                 | -0.03            | 0.00             |

| Exposure                   | Outcome <sup>2</sup> | $\beta$ -Coefficient | P-value <sup>3</sup> | L95 <sup>4</sup> | U95 <sup>5</sup> |
|----------------------------|----------------------|----------------------|----------------------|------------------|------------------|
| Mode of delivery           | C22:4n-6             | 0.01                 | 0.04                 | 0.00             | 0.01             |
| Mode of delivery           | C22:5n-6             | 0.00                 | 0.71                 | 0.00             | 0.00             |
| Mode of delivery           | C22:5n-3             | 0.00                 | 0.43                 | -0.02            | 0.01             |
| Mode of delivery           | C22:6n-3             | -0.04                | 0.11                 | -0.08            | 0.01             |
| Mode of delivery           | SFA                  | 0.75                 | 0.05                 | 0.01             | 1.48             |
| Mode of delivery           | PUFA                 | -0.63                | 0.03                 | -1.22            | -0.05            |
| Mode of delivery           | n-6 PUFA             | -0.55                | 0.04                 | -1.09            | -0.02            |
| Mode of delivery           | n-3 PUFA             | -0.08                | 0.10                 | -0.18            | 0.02             |
| Mode of delivery           | MUFA                 | -0.10                | 0.73                 | -0.68            | 0.48             |
| Mode of delivery           | Trans FA             | -0.01                | 0.55                 | -0.05            | 0.03             |
| Mode of delivery           | SFA/PUFA             | 0.21                 | 0.01                 | 0.05             | 0.38             |
| Mode of delivery           | n-6/n-3 PUFA         | -0.12                | 0.54                 | -0.50            | 0.26             |
| Mode of delivery           | MCFA                 | 0.61                 | 0.07                 | -0.05            | 1.28             |
| Mode of delivery           | LC-PUFA              | -0.03                | 0.52                 | -0.10            | 0.05             |
| Maternal age <sup>14</sup> | C8:0                 | 0.00                 | 0.67                 | 0.00             | 0.00             |
| Maternal age               | C10:0                | 0.00                 | 0.59                 | 0.00             | 0.01             |
| Maternal age               | C12:0                | 0.00                 | 0.78                 | -0.03            | 0.02             |
| Maternal age               | C13:0                | 0.00                 | 0.21                 | 0.00             | 0.00             |
| Maternal age               | C14:0                | 0.00                 | 0.78                 | -0.02            | 0.03             |
| Maternal age               | C14:1                | 0.00                 | 0.82                 | 0.00             | 0.00             |
| Maternal age               | C15:0                | 0.00                 | 0.01                 | 0.00             | 0.00             |
| Maternal age               | C15:1                | 0.00                 | 0.31                 | 0.00             | 0.00             |
| Maternal age               | C16:0                | -0.02                | 0.15                 | -0.05            | 0.01             |
| Maternal age               | C16:1t               | 0.00                 | 0.003                | 0.00             | 0.00             |
| Maternal age               | C16:1n-7             | -0.02                | 0.001                | -0.03            | -0.01            |
| Maternal age               | C17:0                | 0.00                 | 0.21                 | 0.00             | 0.00             |
| Maternal age               | C18:0                | -0.02                | 0.06                 | -0.04            | 0.00             |
| Maternal age               | C18:1t               | -0.01                | 0.001                | -0.01            | 0.00             |
| Maternal age               | C18:1n-9             | 0.00                 | 0.93                 | -0.04            | 0.04             |
| Maternal age               | C18:1n-7             | -0.01                | 0.001                | -0.01            | 0.00             |
| Maternal age               | C18:2n-6             | 0.04                 | 0.06                 | 0.00             | 0.08             |
| Maternal age               | C18:3n-6             | 0.00                 | 0.43                 | 0.00             | 0.00             |
| Maternal age               | C18:3n-3             | 0.01                 | 0.03                 | 0.00             | 0.01             |
| Maternal age               | C20:1n-9             | 0.00                 | <0.001               | 0.00             | 0.01             |
| Maternal age               | C20:2n-6             | 0.00                 | 0.74                 | 0.00             | 0.00             |
| Maternal age               | C20:3n-9             | 0.00                 | 0.04                 | 0.00             | 0.00             |

| Exposure                           | Outcome <sup>2</sup> | $\beta$ -Coefficient | P-value <sup>3</sup> | L95 <sup>4</sup> | U95 <sup>5</sup> |
|------------------------------------|----------------------|----------------------|----------------------|------------------|------------------|
| Maternal age                       | C20:3n-6             | 0.00                 | 0.36                 | 0.00             | 0.00             |
| Maternal age                       | C20:4n-6             | 0.00                 | 0.01                 | 0.00             | 0.00             |
| Maternal age                       | C20:3n-3             | 0.00                 | 0.03                 | 0.00             | 0.00             |
| Maternal age                       | C22:0                | 0.00                 | 0.07                 | 0.00             | 0.00             |
| Maternal age                       | C22:1t               | 0.00                 | <0.001               | 0.00             | 0.00             |
| Maternal age                       | C20:5n-3             | 0.00                 | <0.001               | 0.00             | 0.01             |
| Maternal age                       | C22:4n-6             | 0.00                 | 0.02                 | 0.00             | 0.00             |
| Maternal age                       | C22:5n-6             | 0.00                 | 0.12                 | 0.00             | 0.00             |
| Maternal age                       | C22:5n-3             | 0.00                 | <0.001               | 0.00             | 0.00             |
| Maternal age                       | C22:6n-3             | 0.01                 | <0.001               | 0.01             | 0.01             |
| Maternal age                       | SFA                  | -0.03                | 0.25                 | -0.09            | 0.02             |
| Maternal age                       | PUFA                 | 0.06                 | 0.01                 | 0.01             | 0.11             |
| Maternal age                       | n-6 PUFA             | 0.04                 | 0.09                 | -0.01            | 0.08             |
| Maternal age                       | n-3 PUFA             | 0.02                 | <0.001               | 0.01             | 0.03             |
| Maternal age                       | MUFA                 | -0.02                | 0.41                 | -0.07            | 0.03             |
| Maternal age                       | Trans FA             | 0.00                 | 0.005                | -0.01            | 0.00             |
| Maternal age                       | SFA/PUFA             | -0.02                | 0.02                 | -0.03            | 0.00             |
| Maternal age                       | n-6/n-3 PUFA         | -0.07                | <0.001               | -0.10            | -0.04            |
| Maternal age                       | MCFA                 | 0.00                 | 0.96                 | -0.05            | 0.06             |
| Maternal age                       | LC-PUFA              | 0.01                 | <0.001               | 0.01             | 0.02             |
| Cod liver oil intake <sup>15</sup> | C8:0                 | 0.00                 | 0.69                 | 0.00             | 0.00             |
| Cod liver oil intake               | C10:0                | 0.00                 | 0.45                 | 0.00             | 0.00             |
| Cod liver oil intake               | C12:0                | 0.00                 | 0.97                 | 0.00             | 0.00             |
| Cod liver oil intake               | C13:0                | 0.00                 | 0.07                 | 0.00             | 0.00             |
| Cod liver oil intake               | C14:0                | 0.00                 | 0.11                 | 0.00             | 0.00             |
| Cod liver oil intake               | C14:1                | 0.00                 | 0.30                 | 0.00             | 0.00             |
| Cod liver oil intake               | C15:0                | 0.00                 | <0.001               | 0.00             | 0.00             |
| Cod liver oil intake               | C15:1                | 0.00                 | 0.002                | 0.00             | 0.00             |
| Cod liver oil intake               | C16:0                | 0.00                 | 0.29                 | 0.00             | 0.00             |
| Cod liver oil intake               | C16:1t               | 0.00                 | 0.80                 | 0.00             | 0.00             |
| Cod liver oil intake               | C16:1n-7             | 0.00                 | 0.60                 | 0.00             | 0.00             |
| Cod liver oil intake               | C17:0                | 0.00                 | 0.02                 | 0.00             | 0.00             |
| Cod liver oil intake               | C18:0                | 0.00                 | 0.77                 | 0.00             | 0.00             |
| Cod liver oil intake               | C18:1t               | 0.00                 | 0.18                 | 0.00             | 0.00             |
| Cod liver oil intake               | C18:1n-9             | 0.00                 | 0.01                 | 0.00             | 0.00             |
| Cod liver oil intake               | C18:1n-7             | 0.00                 | 0.77                 | 0.00             | 0.00             |

| Exposure             | Outcome <sup>2</sup> | $\beta$ -Coefficient | P-value <sup>3</sup> | L95 <sup>4</sup> | U95 <sup>5</sup> |
|----------------------|----------------------|----------------------|----------------------|------------------|------------------|
| Cod liver oil intake | C18:2n-6             | 0.00                 | 0.70                 | 0.00             | 0.00             |
| Cod liver oil intake | C18:3n-6             | 0.00                 | 0.21                 | 0.00             | 0.00             |
| Cod liver oil intake | C18:3n-3             | 0.00                 | 0.79                 | 0.00             | 0.00             |
| Cod liver oil intake | C20:1n-9             | 0.00                 | <0.001               | 0.00             | 0.00             |
| Cod liver oil intake | C20:2n-6             | 0.00                 | 0.25                 | 0.00             | 0.00             |
| Cod liver oil intake | C20:3n-9             | 0.00                 | <0.001               | 0.00             | 0.00             |
| Cod liver oil intake | C20:3n-6             | 0.00                 | 0.01                 | 0.00             | 0.00             |
| Cod liver oil intake | C20:4n-6             | 0.00                 | 0.004                | 0.00             | 0.00             |
| Cod liver oil intake | C20:3n-3             | 0.00                 | 0.74                 | 0.00             | 0.00             |
| Cod liver oil intake | C22:0                | 0.00                 | 0.37                 | 0.00             | 0.00             |
| Cod liver oil intake | C22:1t               | 0.00                 | <0.001               | 0.00             | 0.00             |
| Cod liver oil intake | C20:5n-3             | 0.00                 | <0.001               | 0.00             | 0.00             |
| Cod liver oil intake | C22:4n-6             | 0.00                 | <0.001               | 0.00             | 0.00             |
| Cod liver oil intake | C22:5n-6             | 0.00                 | 0.02                 | 0.00             | 0.00             |
| Cod liver oil intake | C22:5n-3             | 0.00                 | <0.001               | 0.00             | 0.00             |
| Cod liver oil intake | C22:6n-3             | 0.00                 | <0.001               | 0.00             | 0.00             |
| Cod liver oil intake | SFA                  | 0.00                 | 0.21                 | 0.00             | 0.00             |
| Cod liver oil intake | PUFA                 | 0.00                 | 0.54                 | 0.00             | 0.00             |
| Cod liver oil intake | n-6 PUFA             | 0.00                 | 0.50                 | 0.00             | 0.00             |
| Cod liver oil intake | n-3 PUFA             | 0.00                 | <0.001               | 0.00             | 0.00             |
| Cod liver oil intake | MUFA                 | 0.00                 | 0.03                 | 0.00             | 0.00             |
| Cod liver oil intake | Trans FA             | 0.00                 | 0.63                 | 0.00             | 0.00             |
| Cod liver oil intake | SFA/PUFA             | 0.00                 | 0.95                 | 0.00             | 0.00             |
| Cod liver oil intake | n-6/n-3 PUFA         | 0.00                 | <0.001               | -0.01            | 0.00             |
| Cod liver oil intake | MCFA                 | 0.00                 | 0.42                 | 0.00             | 0.00             |
| Cod liver oil intake | LC-PUFA              | 0.00                 | <0.001               | 0.00             | 0.00             |

<sup>1</sup> Models run in multiply imputed data set (n=789) in 10 imputed sets. Each predictor-percent composition model was adjusted for an individual set of confounders.

<sup>2</sup> Abbreviations are as follows: SFA = saturated fatty acid; MUFA = monounsaturated fatty acid; PUFA = polyunsaturated fatty acid; trans-FA = trans fatty acid; MCFA = medium chain fatty acid; and LC-PUFA = long chain polyunsaturated fatty acid. Outcome was percent composition of each triglyceride fatty acid, with the exception of the SFA/PUFA ratio and n-6/n-3 PUFA ratio.

<sup>3</sup> Values of 0.000 represent a p-value less than 0.001.

<sup>4</sup> Values of 0.00 represent a lower 95% confidence interval (CI) value of <0.01.

<sup>5</sup> Values of 0.00 represent an upper 95% CI value of <0.01.

<sup>6</sup> Defined as BMI < 18.5 kg/m<sup>2</sup>. Model adjusted for maternal age, education, parity, infant age at milk collection, formula introduction.

<sup>7</sup> Defined as BMI  $\geq$  30 kg/m<sup>2</sup>. Model adjusted for maternal age, education, parity, infant age at milk collection, formula introduction.

<sup>8</sup> Defined by BMI according to guidelines set forth by Institutes of Medicine: for underweight women, >18.1kg; for normal weight women, >15.9kg; for overweight women, >11.3kg; and for obese women, >9.1kg. Model adjusted for gestational age, maternal age, education, parity, infant age at milk collection, formula introduction.

<sup>9</sup> Defined as primiparous or multiparous. Model adjusted for maternal age, education, infant age at milk collection, formula introduction.

<sup>10</sup> Defined as current smoker versus former/never smoker at the start of pregnancy. Model adjusted for maternal education, infant age at milk collection, formula introduction.

<sup>11</sup> Measured in days. Model adjusted for BMI, smoking, parity, infant age at milk collection, formula introduction.

<sup>12</sup> Defined as number of fatty fish dinners consumed in the previous year. Model adjusted for BMI, education, cod liver oil, infant age at milk collection, formula introduction.

<sup>13</sup> Defined as vaginal delivery versus cesarean section. Model adjusted for maternal age, BMI, birthweight, gestational age, excess weight gain in pregnancy, parity, smoking, infant age at milk collection, formula introduction.

<sup>14</sup> Defined as maternal age in years at the start of pregnancy. Model adjusted for parity, infant age at milk collection, formula introduction.

<sup>15</sup> Defined as servings of cod liver oil consumed in the previous year. Model adjusted for education, BMI, fatty fish intake, infant age at milk collection, formula introduction.



**Supplemental Table S4. Associations<sup>1</sup> between select<sup>2</sup> triglyceride fatty acids and failure to thrive<sup>3</sup>**

| Fatty Acid <sup>4</sup>                                            |               | Unadjusted model |                     |         | Adjusted model <sup>5</sup> |                     |         |
|--------------------------------------------------------------------|---------------|------------------|---------------------|---------|-----------------------------|---------------------|---------|
|                                                                    |               | Odds ratio       | Confidence Interval | P-value | Odds ratio                  | Confidence Interval | P-value |
| C12:0                                                              | Lauric acid   | 0.99             | 0.89 – 1.09         | 0.78    | 1.00                        | 0.87 – 1.14         | 0.96    |
| C14:0                                                              | Myristic acid | 1.03             | 0.92 – 1.15         | 0.59    | 1.04                        | 0.89 – 1.23         | 0.62    |
| Saturated fatty acids <sup>6</sup>                                 |               | 1.02             | 0.97 – 1.06         | 0.46    | 1.03                        | 0.96 – 1.09         | 0.45    |
| Saturated fatty acids/<br>Polyunsaturated fatty acids <sup>7</sup> |               | 1.14             | 0.94 – 1.38         | 0.18    | 1.10                        | 0.84 – 1.45         | 0.49    |
| Medium chain fatty acids <sup>8</sup>                              |               | 1.00             | 0.95 – 1.05         | 1.00    | 1.01                        | 0.94 – 1.08         | 0.84    |

<sup>1</sup> Analysis run in the complete case set (n=789).

<sup>2</sup> Triglyceride fatty acids included in this analysis were ones that had notable inverse associations with rapid growth in previous analyses.

<sup>3</sup> Defined as change in weight-for-age z-score  $\leq -0.67$  between 0 and 6 months. In the complete case set, 191 infants (24.2%) met this criteria.

<sup>4</sup> Exposure was the percent composition of the triglyceride fatty acid.

<sup>5</sup> Models adjusted for maternal age, smoking, education, pre-pregnancy body mass index, gestational weight gain, parity, and child sex.

<sup>6</sup> Includes C8:0, C10:0, C12:0, C13:0, C14:0, C15:0, C16:0, C17:0, C18:0, and C22:0.

<sup>7</sup> Exposure was the ratio, not percent composition. Polyunsaturated fatty acids included C18:3n-3, C20:3n-3, C20:5n-3, C22:5n-3, C22:6n-3, C18:2n-6, C18:3n-6, C20:2n-6<sup>4</sup>, C20:3n-6, C20:4n-6, C22:4n-6, C22:5n-6, and C20:3n-9.

<sup>8</sup> Includes C8:0, C10:0, C12:0, and C14:0.
